# Supplementary material for: Pursuing excitonic energy transfer with programmable DNA-based optical breadboards
Source: PubMed Central journal article supplement (PMC10642627; doi:10.1039/d0cs00936a), 2023-10-24
Supplement: CS-052-D0CS00936A-s001.pdf [file CS-052-D0CS00936A-s001.pdf]

## SUPPORTING INFORMATION

### Pursuing Excitonic Energy Transfer with Programmable DNA-based Optical Breadboards

Divita Mathur<sup>1,8</sup>, Sebastián A. Díaz<sup>2,8</sup>, Niko Hildebrandt<sup>4,5</sup>, Ryan D. Pensack<sup>6</sup>,  
Bernard Yurke<sup>6</sup>, Austin Biaggne<sup>6</sup>, Lan Li<sup>6,7</sup>, Joseph S. Melinger<sup>3</sup>,  
Mario G. Ancona<sup>3,8</sup>, William B. Knowlton<sup>6\*</sup>, and Igor L. Medintz<sup>2\*</sup>

<sup>1</sup>Department of Chemistry  
Case Western Reserve University  
Cleveland OH 44106 USA

<sup>2</sup>Center for Bio/Molecular Science and Engineering, Code 6900

<sup>3</sup>Electronics Science and Technology Division, Code 6800  
U.S. Naval Research Laboratory  
Washington, DC 20375 USA

<sup>4</sup>Department of Chemistry  
Seoul National University  
Seoul 08826, South Korea

<sup>5</sup>Laboratoire COBRA  
Université de Rouen Normandie  
CNRS, INSA, Normandie Université,  
76000 Rouen, France

<sup>6</sup>Micron School of Materials Science & Engineering  
Boise State University,  
Boise, ID 83725 USA

<sup>7</sup>Center for Advanced Energy Studies  
Idaho Falls, ID 83401, USA

<sup>8</sup>Department of Electrical and Computer Engineering  
Florida State University  
Tallahassee, FL 32310, USA

<sup>8</sup>Equal contributions

\*Corresponding Authors: [bknowlton@boisestate.edu](mailto:bknowlton@boisestate.edu)  
[igor.medintz@nrl.navy.mil](mailto:igor.medintz@nrl.navy.mil)

**Keywords:** DNA, Nanotechnology, Energy Transfer, Dye, FRET, Dipole, Donor, Acceptor,  
Exciton, Delocalization, Coherence, Photonic Wire

**Supporting Table 1:** Phosphoramidites available for in-synthesis modification of oligonucleotides. Reactive groups that are available as 3' modification are usually present on the CPG whereas 5', internal (int), and modified bases (dA, dC, dG, dT, dU) are available as phosphoramidites. \*Commercially available. C<sub>x</sub> - carbon linker of x length. TEG - triethylene glycol. Glen - Glen Research, Inc.

| <u>Reactive group/handle</u> | <u>Linkers</u>                   | <u>Purpose</u>                                     | <u>Availability</u> | <u>Ref</u> |
|------------------------------|----------------------------------|----------------------------------------------------|---------------------|------------|
| Biotin*                      | C <sub>6</sub> , TEG             | Affinity for streptavidin                          | 5' int 3' dT        | 1          |
| Thiol*                       | C <sub>3</sub> , C <sub>6</sub>  | Gold, maleimide                                    | 5' 3'               | 2          |
| DBCO*                        | TEG                              | Azide click chemistry                              | 5' int dT           | 3          |
| Phosphate*                   | None                             | Ligate another DNA                                 | 5' 3'               | Glen       |
| Amino*                       | C <sub>6</sub> , C <sub>12</sub> | Amide click chemistry                              | 5' int dT           | Glen       |
| Alkyne*                      | C <sub>8</sub>                   | Azide click chemistry                              | 5' int 3'           | Glen       |
| Maleimide*                   | C <sub>2</sub>                   | Thiol click chemistry                              | 5'                  | 4          |
| Methacrylate*                | C <sub>6</sub>                   | React with thiol, crosslink (expansion microscopy) | 5'                  | 5          |
| Dendrimers*                  | C <sub>2</sub> -C <sub>4</sub>   | DNA branching                                      | 5'                  | 6          |
| Aldehyde*                    | Backbone                         | Amine click chemistry                              | 5'                  | 7          |
| Triazole                     | Ethynyl spacer                   | Reduce anionic charge, DNA and/or LNA ligation     | Int                 | 8-10       |
| Cholesteryl*                 | TEG                              | Enhance cell permeability of DNA (10908328 ?)      | 5' int 3'           | Glen       |
| Ferrocene*                   | Nucleotide                       | Generate probes for electrochemical detection      | dT                  | 11, 12     |
| Azobenzene*                  | D-threoninol                     | Photo-reactive modification                        | int                 | 13         |
| Triazine                     | Nucleotide                       | Reactive to 1-methylcyclopropenes                  | dU, dA              | 14         |
| Cyclopropene                 | Nucleotide                       | Reactive to triazine                               | dU, dA              | 14         |
| Ruthenium bipyridine         | Nucleotide                       | Metallization, fluorescence                        | Int base            | 15-18      |

|                                                              |                                 |                                                                               |              |        |
|--------------------------------------------------------------|---------------------------------|-------------------------------------------------------------------------------|--------------|--------|
| Terpyridine, Dipicolylamine*<br>phenanthroline, dithioethers | Nucleotide                      | Metal coordination (Zn, Ni, Cu, Ag, Pb, etc) in DNA and LNA                   | 5' int dG    | 19-23  |
| Porphyrin                                                    | Backbone                        | Electron transfer, DNA aggregation                                            | Int dC       | 24, 25 |
| Galactose/carbohydrates                                      | Nucleotide                      | Site-specific carbohydrate bioconjugation                                     | Int dU       | 26, 27 |
| Iodine/Bromine*                                              | Nucleotide                      | Carbohydrate conjugation, photo cross-linking                                 | dC dU        | Glen   |
| <b>Dyes</b>                                                  |                                 |                                                                               |              |        |
| Cyanine (Cy3, Cy3.5, Cy5,<br>Cy5.5)*                         | C <sub>3</sub> /C <sub>6</sub>  | Attachment of Cy dye to DNA backbone via single or double phosphodiester bond | 5' int 3'    |        |
| Methylene Blue*                                              | C <sub>2</sub> /C <sub>3</sub>  | Attachment of MB to DNA via single or double phosphodiester bond              | 5' Int 3'    |        |
| Black Hole, Blackberry™, and<br>Dabcyl Quenchers*            | C <sub>2</sub> /C <sub>6</sub>  | Attachment to DNA via single phosphodiester terminal bond or via T nucleotide | 5' dT 3'     |        |
| Fluorescein*                                                 | C <sub>6</sub>                  | Attachment to DNA via single/double phosphoramidite and T nucleotide          | 5' Int dT 3' |        |
| Rhodamine*                                                   | C <sub>6</sub>                  | Attachment to DNA via dT or 3' end single phosphodiester bond                 | dT 3'        |        |
| ATTO/Alexa Fluor™ dyes                                       | C <sub>6</sub> /C <sub>12</sub> | Attachment to DNA via single phosphodiester bond                              | 5' 3'        |        |

## Supporting References:

1. R. T. Pon, *Tetrahedron Lett*, 1991, **32**, 1715-1718.
2. B. A. Connolly and P. Rider, *Nucleic Acids Res*, 1985, **13**, 4485-4502.
3. P. van Delft, N. J. Meeuwenoord, S. Hoogendoorn, J. Dinkelaar, H. S. Overkleeft, G. A. van der Marel and D. V. Filippov, *Org Lett*, 2010, **12**, 5486-5489.
4. A. Sanchez, E. Pedroso and A. Grandas, *Org Lett*, 2011, **13**, 4364-4367.
5. F. N. Rehman, M. Audeh, E. S. Abrams, P. W. Hammond, M. Kenney and T. C. Boles, *Nucleic Acids Res*, 1999, **27**, 649-655.
6. M. S. Shchepinov, K. U. Mir, J. K. Elder, M. D. Frank-Kamenetskii and E. M. Southern, *Nucleic Acids Res*, 1999, **27**, 3035-3041.
7. M. A. Podyminogin, E. A. Lukhtanov and M. W. Reed, *Nucleic Acids Res*, 2001, **29**, 5090-5098.
8. P. Kumar, L. Truong, Y. R. Baker, A. H. El-Sagheer and T. Brown, *ACS Omega*, 2018, **3**, 6976-6987.
9. I. Manuguerra, S. Croce, A. H. El-Sagheer, A. Krissanaprasit, T. Brown, K. V. Gothelf and A. Manetto, *Chem Commun*, 2018, **54**, 4529-4532.
10. A. H. El-Sagheer and T. Brown, *Acc Chem Res*, 2012, **45**, 1258-1267.
11. A. E. Navarro, N. Spinelli, C. Moustrou, C. Chaix, B. Mandrand and H. Brisset, *Nucleic Acids Res*, 2004, **32**, 5310-5319.
12. H. Brisset, A. E. Navarro, N. Spinelli, C. Chaix and B. Mandrand, *Biotechnol J*, 2006, **1**, 95-98.
13. H. Asanuma, T. Takarada, T. Yoshida, D. Tamaru, X. Liang and M. Komiyama, *Angew Chem Int Ed*, 2001, **40**, 2671-2673.
14. U. Reisacher, D. Ploschik, F. Ronicke, G. B. Cserep, P. Kele and H. A. Wagenknecht, *Chem Sci*, 2019, **10**, 4032-4037.
15. F. D. Lewis, S. A. Helvoigt and R. L. Letsinger, *Chem Commun*, 1999, DOI: 10.1039/A808491B, 327-328.
16. S. I. Khan, A. E. Beilstein, M. Sykora, G. D. Smith, X. Hu and M. W. Grinstaff, *Inorganic Chem*, 1999, **38**, 3922-3925.
17. D. J. Hurley and Y. Tor, *J Am Chem Soc*, 2002, **124**, 13231-13241.
18. D. J. Hurley and Y. Tor, *J Am Chem Soc*, 1998, **120**, 2194-2195.
19. J. S. Choi, C. W. Kang, K. Jung, J. W. Yang, Y.-G. Kim and H. Han, *J Am Chem Soc*, 2004, **126**, 8606-8607.
20. M. M. Knagge and J. J. Wilker, *Chem Commun*, 2007, DOI: 10.1039/b704741j, 3356-3358.
21. K. Wiederholt and L. W. McLaughlin, *Nucleic Acids Res*, 1999, **27**, 2487-2493.
22. A. Galeone, L. Mayol, G. Oliviero, D. Rigano and M. Varra, *Bioorganic & Medicinal Chem Lett*, 2001, **11**, 383-386.
23. M. Kalek, A. S. Madsen and J. Wengel, *J Am Chem Soc*, 2007, **129**, 9392-9400.
24. H. Morales-Rojas and E. T. Kool, *Organic Letters*, 2002, **4**, 4377-4380.
25. K. Berlin, R. K. Jain, M. D. Simon and C. Richert, *J Organic Chem*, 1998, **63**, 1527-1535.
26. T. L. Sheppard, C. H. Wong and G. F. Joyce, *Angew Chem Int Ed*, 2000, **39**, 3660-3663.
27. K. Matsuura, M. Hibino, M. Kataoka, Y. Hayakawa and K. Kobayashi, *Tetrahedron Lett*, 2000, **41**, 7529-7533.
